# Supplementary material for: Change in incidence, characteristics and management of colorectal neuroendocrine tumours in the Netherlands in the last decade
Source: PubMed Central journal article supplement — United European Gastroenterol J. 2019 Jul 15;8(1):59–67. doi: 10.1177/2050640619865113 (PMC7006007; doi:10.1177/2050640619865113), 2019-07-15
Supplement: Supplemental_Material_1.pdf [file Supplemental_Material_1.pdf]

## Appendix Table

Observed incidence rates in the Netherlands standardised for several (standard) populations.

| <b>Standardized population</b> | <b>2006</b> | <b>2007</b> | <b>2008</b> | <b>2009</b> | <b>2010</b> | <b>2011</b> | <b>2012</b> | <b>2013</b> | <b>2014</b> | <b>2015</b> | <b>2016</b> |
|--------------------------------|-------------|-------------|-------------|-------------|-------------|-------------|-------------|-------------|-------------|-------------|-------------|
| NL 2006 - 2016                 | 0.36        | 0.51        | 0.37        | 0.46        | 0.54        | 0.75        | 0.64        | 0.69        | 0.65        | 0.67        | 0.69        |
| WHO 2000 - 2025                | 0.25        | 0.37        | 0.26        | 0.33        | 0.39        | 0.55        | 0.45        | 0.51        | 0.40        | 0.43        | 0.44        |
| US 2000                        | 0.32        | 0.45        | 0.31        | 0.39        | 0.47        | 0.64        | 0.54        | 0.60        | 0.52        | 0.52        | 0.53        |
| EU 2013                        | 0.41        | 0.56        | 0.40        | 0.49        | 0.57        | 0.79        | 0.66        | 0.71        | 0.68        | 0.69        | 0.70        |

NL = the Netherlands; WHO = World Health Organization; US = United States; EU = Europe

## Appendix Figure

Observed incidence rates in the Netherlands standardised for several (standard) populations.

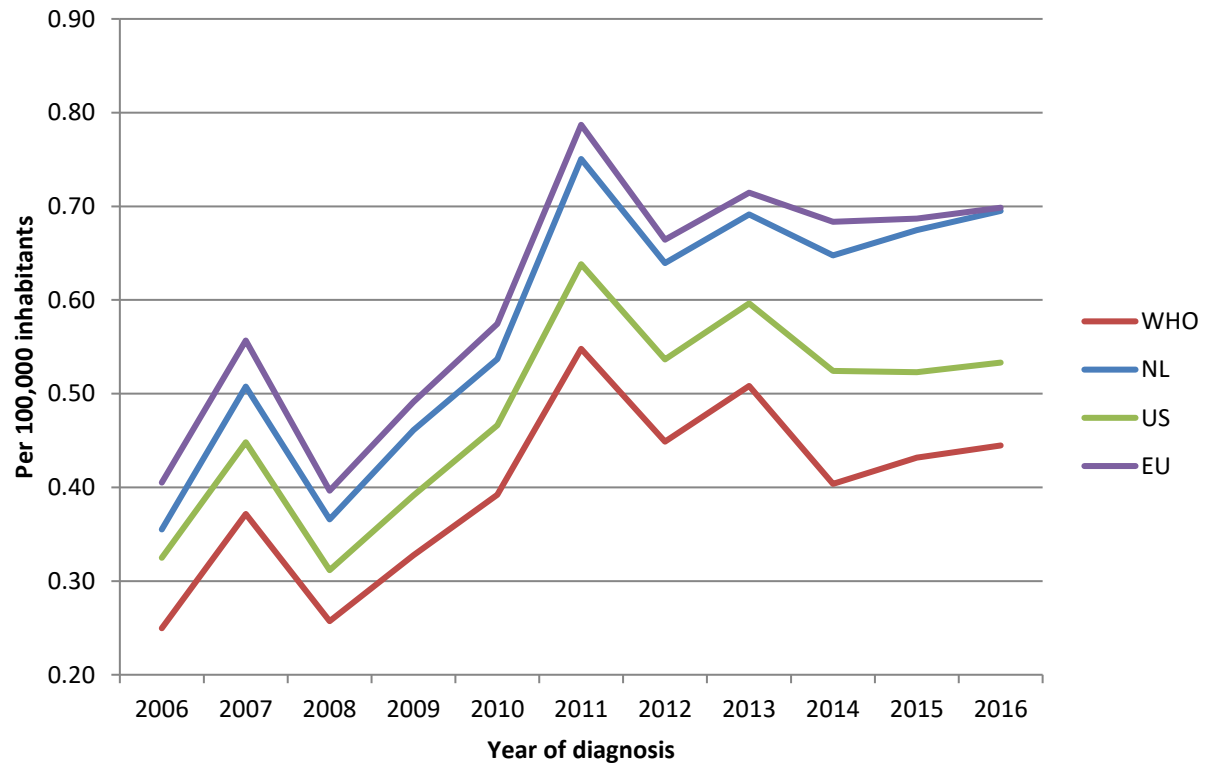

NL = the Netherlands; WHO = World Health Organization; US = United States; EU = Europe
